# Supplementary material
Source: MDPI journal article supplement (https://www.mdpi.com/2072-4292/14/17/4349)
Supplement: s1 [file s1]

# Supplementary Materials

## Figures

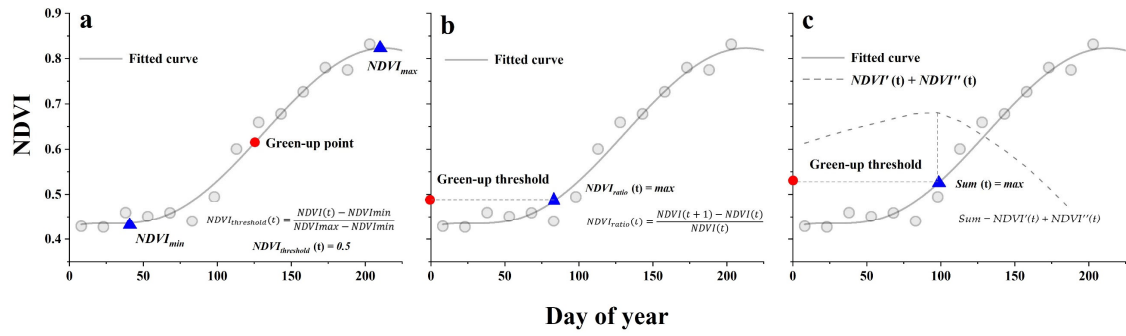

**Figure S1.** The theoretical curves of three methods for identifying the spring green-up date (GUD) in a single phenological year of an illustrative pixel.

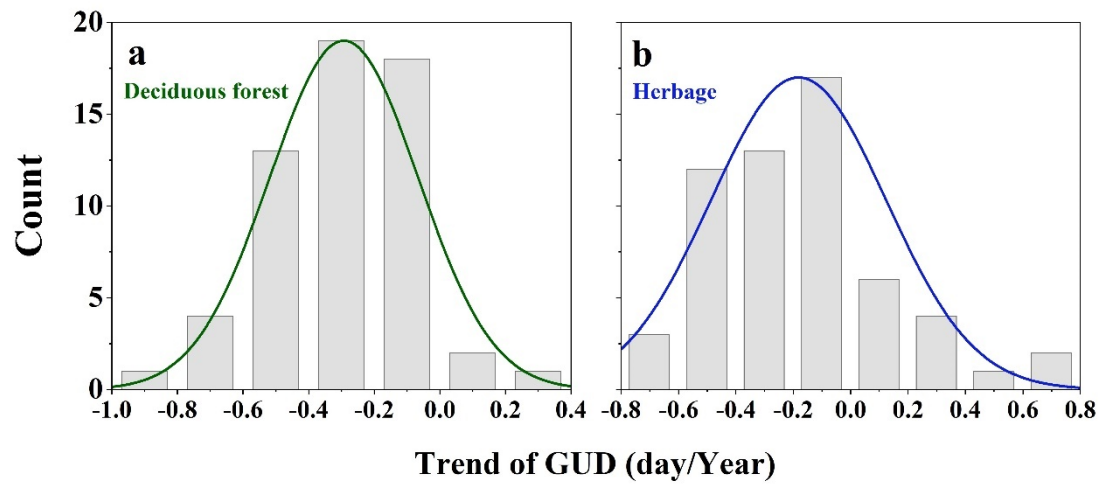

**Figure S2.** The trend of green-up dates (GUD) for deciduous forest (a) and herbages (b) in each forest-herbage-mixed (FHM) site over more than 25 years from 1982 to 2013.

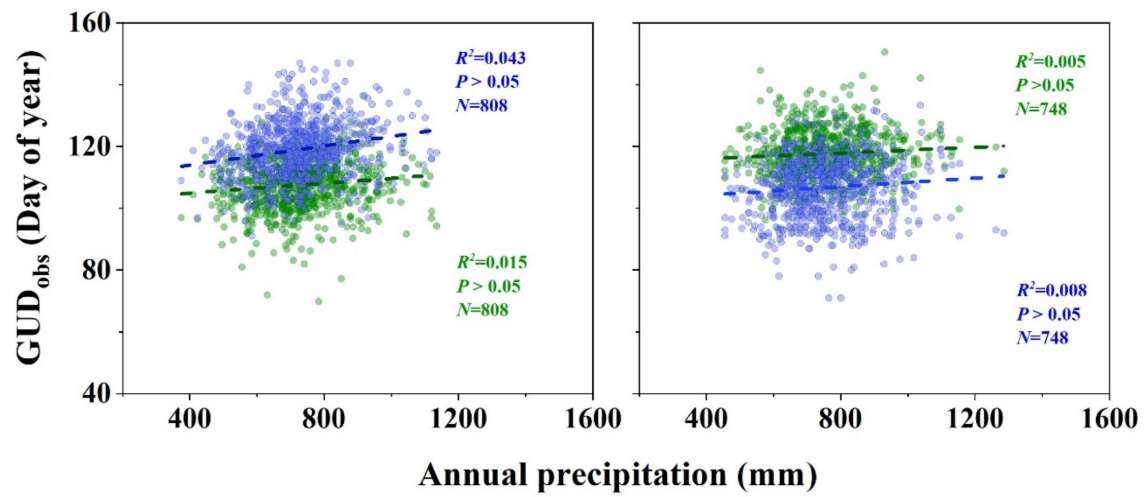

**Figure S3.** Relationships between annual observed green-up date (GUD<sub>obs</sub>) of deciduous forest (green) and herbages (blue), and annual precipitation for all FHM sites with GUD<sub>obs-forest</sub> < GUD<sub>obs-herbage</sub> (a) and with GUD<sub>obs-herbage</sub> < GUD<sub>obs-forest</sub> (b).

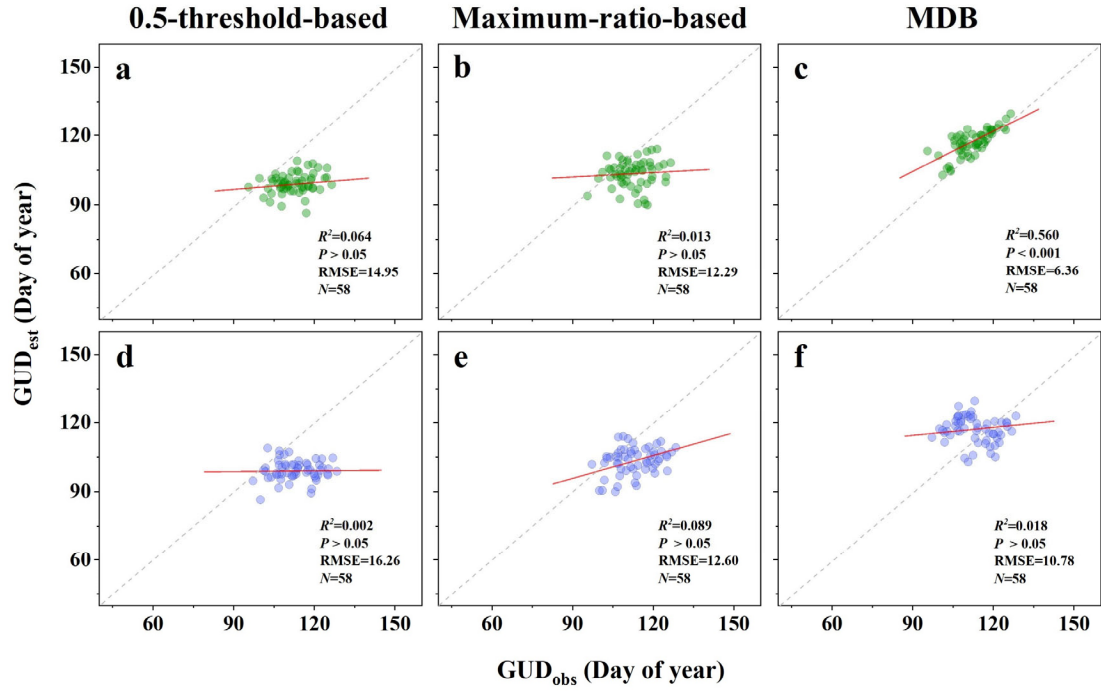

**Figure S4.** Comparisons between multi-years average observed green-up date ( $GUD_{obs}$ ) of deciduous forest (green) and herbages (blue), and estimated green-up date ( $GUD_{est}$ ) of three methods (0.5-threshold-based method, Maximum-ratio-based method and Maximum-derivative-based (MDB) method) for all FHM sites. The gray dashed line represents the 1:1 line, and the red lines are the regression lines. The root mean square error (RMSE) was also used to evaluate the predictive performance.

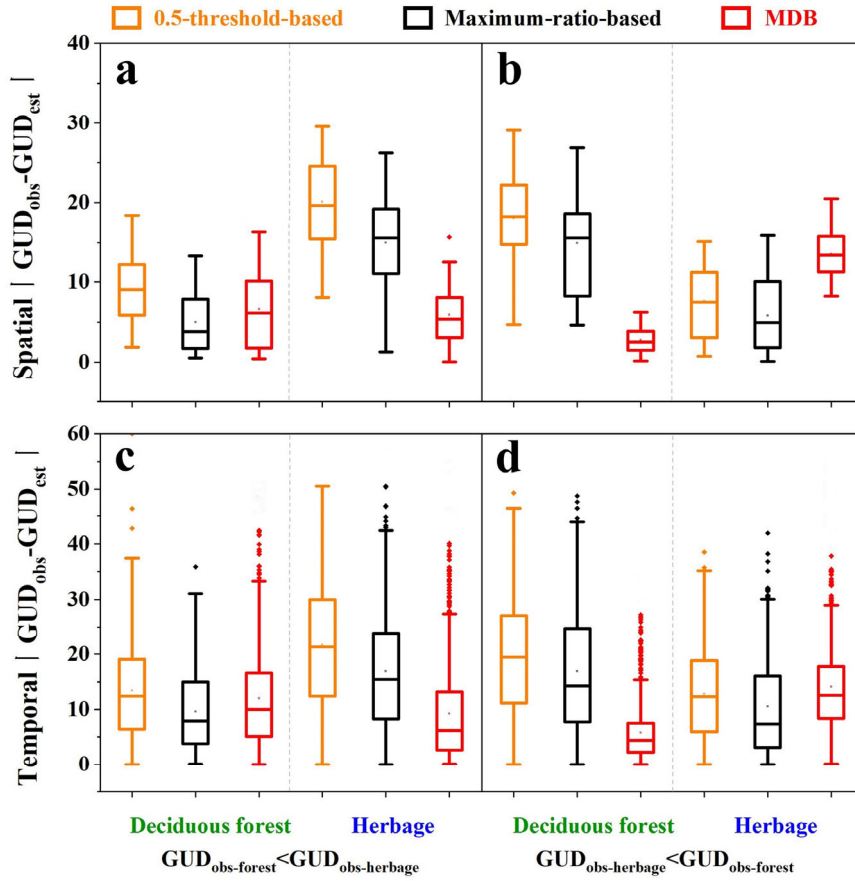

**Figure S5.** Comparisons of three predicted methods (0.5-threshold-based method, Maximum-ratio-based method and Maximum-derivative-based (MDB) method) for reproducing the spatial and temporal variations of green-up date (GUD) by using absolute differences between observed GUD of deciduous forest and herbage, and estimated GUD ( $|GUD_{obs} - GUD_{est}|$ ) through all FHM sites with  $GUD_{obs-forest} < GUD_{obs-herbage}$  and with  $GUD_{obs-herbage} < GUD_{obs-forest}$ .

## Tables

**Table S1** The forest-herbage-mixed (FHM) sites with  $GUD_{\text{obs-forest}} < GUD_{\text{obs-herbage}}$  from the Pan European Phenology network (PEP725).

| Country | Name           | PEP_ID | Lon     | Lat     | Tem   | Pre    | Years | Dec_forest<br>(%) | Herbage<br>(%) | F+G (%) |
|---------|----------------|--------|---------|---------|-------|--------|-------|-------------------|----------------|---------|
| Germany | KELLINGHUSEN   | 280    | 9.71667 | 53.95   | 9.48  | 782.23 | 25    | 30.27             | 32.56          | 93.59   |
| Germany | KOENIGSFOERDE  | 402    | 9.26667 | 52.0667 | 9.41  | 739.21 | 25    | 21.95             | 64.77          | 93.12   |
| Germany | UELZEN         | 790    | 10.5667 | 52.9667 | 9.39  | 644.74 | 27    | 29.14             | 32.18          | 80.81   |
| Germany | GASTE          | 969    | 7.95    | 52.25   | 9.85  | 738.30 | 29    | 30.73             | 30.88          | 91.35   |
| Germany | SCHLICH        | 1448   | 6.41667 | 50.8    | 9.67  | 969.14 | 27    | 28.13             | 57.01          | 93.50   |
| Germany | STROMBERG      | 1524   | 8.2     | 51.8    | 9.81  | 747.53 | 28    | 24.66             | 64.87          | 96.62   |
| Germany | ISINGDORF      | 1646   | 8.43333 | 52.05   | 9.51  | 759.52 | 25    | 24.12             | 45.32          | 92.50   |
| Germany | BRENSBACH      | 1953   | 8.88333 | 49.7667 | 10.16 | 672.14 | 28    | 42.70             | 41.44          | 92.86   |
| Germany | RIMHORN        | 1981   | 9.03333 | 49.7833 | 9.63  | 664.65 | 29    | 45.89             | 23.88          | 76.76   |
| Germany | AUE            | 2055   | 10.1167 | 51.1833 | 8.50  | 673.92 | 25    | 50.10             | 29.49          | 92.00   |
| Germany | JESTAEDT       | 2061   | 10.0167 | 51.2167 | 8.50  | 677.54 | 26    | 29.92             | 43.12          | 93.56   |
| Germany | BERGEN-ENKHEIM | 2351   | 8.75    | 50.15   | 9.89  | 673.96 | 27    | 27.36             | 32.95          | 94.42   |
| Germany | GEBROTH        | 2521   | 7.65    | 49.8667 | 10.03 | 694.22 | 25    | 55.04             | 35.20          | 94.10   |
| Germany | MONREAL        | 2531   | 7.16667 | 50.3    | 9.88  | 792.56 | 25    | 45.81             | 39.77          | 94.52   |
| Germany | OBERBETTINGEN  | 2613   | 6.63333 | 50.2833 | 9.14  | 905.40 | 25    | 25.48             | 40.89          | 86.81   |
| Germany | BORNICH        | 2672   | 7.75    | 50.1333 | 9.66  | 720.75 | 26    | 28.14             | 45.14          | 95.05   |
| Germany | FREILINGEN     | 2690   | 7.83333 | 50.5667 | 9.60  | 776.12 | 26    | 35.28             | 28.90          | 83.70   |

---

|         |                   |      |         |         |       |        |    |       |       |       |
|---------|-------------------|------|---------|---------|-------|--------|----|-------|-------|-------|
| Germany | GEHRWEILER        | 2820 | 7.76667 | 49.5833 | 10.07 | 690.82 | 30 | 34.87 | 55.34 | 96.98 |
| Germany | OBERDERDINGEN     | 3023 | 8.8     | 49.0667 | 10.66 | 694.68 | 26 | 29.00 | 51.39 | 95.90 |
| Germany | BRUCHSAL          | 3052 | 8.58333 | 49.1333 | 10.63 | 685.43 | 27 | 30.23 | 31.15 | 89.76 |
| Germany | EGGENSTEIN        | 3099 | 8.38333 | 49.0833 | 10.99 | 695.54 | 31 | 33.58 | 26.69 | 81.37 |
| Germany | HELMSTADT         | 3146 | 8.98333 | 49.3333 | 10.69 | 690.20 | 25 | 25.41 | 70.82 | 97.12 |
| Germany | LAHR              | 3237 | 7.88333 | 48.3333 | 10.82 | 819.22 | 25 | 42.84 | 25.79 | 85.43 |
| Germany | RINGINGEN         | 3381 | 9.81667 | 48.35   | 8.90  | 835.32 | 26 | 29.59 | 51.59 | 84.65 |
| Germany | DEGGENDORF        | 3693 | 12.9667 | 48.8333 | 9.23  | 773.90 | 27 | 26.86 | 40.03 | 91.06 |
| Germany | IHRLESTEIN        | 3738 | 11.8667 | 48.9333 | 8.79  | 710.60 | 26 | 45.95 | 14.63 | 71.29 |
| Germany | HELDTRIT          | 4039 | 10.8    | 50.3667 | 8.79  | 612.78 | 27 | 23.57 | 46.55 | 86.25 |
| Germany | KLEINBLITTERSDORF | 4632 | 7.05    | 49.1667 | 10.06 | 725.80 | 31 | 34.09 | 29.15 | 94.90 |
| Germany | LEBACH            | 4641 | 6.91667 | 49.4167 | 10.23 | 740.25 | 31 | 32.09 | 46.54 | 93.32 |
| Germany | BRANDIS2          | 5659 | 12.6167 | 51.3333 | 9.77  | 528.90 | 28 | 23.65 | 47.18 | 87.88 |

---

*Lon*, longitude; *Lat*, latitude; *Tem*, multi-years average temperature; *Pre*, multi-year average precipitation; *Years*, number of years with record; *Dec\_forest (%)*, the percentage of deciduous forest area in a grid zone with spatial resolution is 0.083 degree; *Herbage (%)*, the percentage of herbage area in a grid zone with spatial resolution is 0.083 degree; *F+G (%)*, the percentage of deciduous forest and herbage area to all vegetation area in a grid zone with spatial resolution is 0.083 degree.

**Table S2** The forest-herbage-mixed (FHM) sites with  $GUD_{\text{obs-herbage}} < GUD_{\text{obs-forest}}$  from the Pan European Phenology network (PEP725).

| Country | Name          | PEP_ID | Lon     | Lat     | Tem   | Pre    | Years | Dec_forest<br>(%) | Herbage<br>(%) | F+G (%) |
|---------|---------------|--------|---------|---------|-------|--------|-------|-------------------|----------------|---------|
| Germany | IMMENSEN      | 598    | 10.0667 | 52.4    | 9.22  | 647.34 | 28    | 23.62             | 41.07          | 81.94   |
| Germany | STELICHTE     | 640    | 9.53333 | 52.95   | 9.50  | 695.81 | 31    | 21.30             | 42.34          | 77.13   |
| Germany | KALLENHARDT   | 1788   | 8.43333 | 51.45   | 8.62  | 845.50 | 26    | 37.46             | 23.80          | 72.06   |
| Germany | WEIDENHAUSEN  | 1851   | 8.36667 | 51      | 9.13  | 763.53 | 26    | 48.65             | 26.29          | 72.68   |
| Germany | EIFA          | 1906   | 9.33333 | 50.75   | 8.63  | 761.44 | 25    | 39.17             | 44.71          | 92.56   |
| Germany | OBER-OHMEN    | 1911   | 9.11667 | 50.6167 | 8.55  | 756.22 | 25    | 29.63             | 47.73          | 96.30   |
| Germany | RHODEN        | 2250   | 9.01667 | 51.4667 | 8.52  | 786.96 | 29    | 27.89             | 43.52          | 81.50   |
| Germany | BRAUNFELS     | 2432   | 8.38333 | 50.5167 | 9.21  | 766.51 | 27    | 53.39             | 23.53          | 92.50   |
| Germany | HONIGSESSEN   | 2485   | 7.75    | 50.8167 | 9.51  | 787.68 | 26    | 54.88             | 21.90          | 81.26   |
| Germany | KERPEN        | 2608   | 6.73333 | 50.3    | 9.30  | 893.18 | 26    | 27.44             | 47.89          | 91.84   |
| Germany | SINDELFINGEN  | 2879   | 9       | 48.7    | 9.81  | 694.83 | 26    | 32.67             | 27.42          | 91.43   |
| Germany | RUECKERSHAGEN | 2886   | 9.95    | 49.25   | 8.95  | 650.23 | 26    | 25.81             | 65.35          | 97.42   |
| Germany | RUIT          | 2899   | 9.26667 | 48.7333 | 9.82  | 675.89 | 26    | 28.38             | 35.32          | 92.01   |
| Germany | GERSTETTEN    | 2914   | 10.0167 | 48.6333 | 8.56  | 714.48 | 25    | 36.81             | 47.39          | 90.65   |
| Germany | MOENSHEIM     | 2953   | 8.86667 | 48.8667 | 9.50  | 844.87 | 25    | 41.15             | 39.19          | 93.00   |
| Germany | NELLINGEN     | 3019   | 9.8     | 48.55   | 8.36  | 763.01 | 25    | 21.85             | 68.50          | 94.80   |
| Germany | ADELSHEIM     | 3065   | 9.4     | 49.4    | 10.05 | 641.51 | 27    | 30.24             | 53.16          | 93.32   |
| Germany | BALINGEN      | 3346   | 8.85    | 48.2833 | 8.87  | 973.13 | 30    | 23.45             | 43.59          | 86.20   |
| Germany | GENKINGEN     | 3422   | 9.2     | 48.4    | 8.58  | 938.47 | 29    | 51.08             | 36.42          | 93.82   |



---

|         |             |      |         |         |       |        |    |       |       |       |
|---------|-------------|------|---------|---------|-------|--------|----|-------|-------|-------|
| Germany | GINDLKOFEN  | 3534 | 11.95   | 48.05   | 8.98  | 777.83 | 31 | 25.02 | 59.34 | 90.04 |
| Germany | WOLNZACH    | 3617 | 11.6333 | 48.6    | 8.78  | 712.39 | 27 | 25.10 | 65.30 | 84.81 |
| Germany | KALLMUENZ   | 3858 | 11.9667 | 49.1667 | 8.68  | 658.48 | 27 | 30.07 | 46.20 | 71.36 |
| Germany | FURTHIMWALD | 3865 | 12.85   | 49.3167 | 8.28  | 730.00 | 25 | 24.89 | 43.30 | 87.05 |
| Germany | MUEHLHAUSEN | 3884 | 11.45   | 49.1667 | 9.06  | 656.91 | 26 | 22.55 | 40.19 | 72.58 |
| Germany | SCHOENACH   | 3937 | 12.4333 | 48.9167 | 8.83  | 730.70 | 25 | 25.92 | 71.35 | 95.32 |
| Germany | SANDERSDORF | 3945 | 11.6167 | 48.9    | 8.76  | 713.77 | 25 | 23.35 | 55.33 | 79.54 |
| Germany | LIMBACH     | 4643 | 6.9     | 49.4667 | 10.14 | 734.07 | 26 | 55.22 | 30.25 | 94.42 |
| Germany | OTZENHAUSEN | 4664 | 7       | 49.6    | 9.48  | 777.53 | 28 | 58.68 | 24.05 | 80.20 |

*Lon*, longitude; *Lat*, latitude; *Tem*, multi-years average temperature; *Pre*, multi-year average precipitation; *Years*, number of years with record; *Dec\_forest (%)*, the percentage of deciduous forest area in a grid zone with spatial resolution is 0.083 degree; *Herbage (%)*, the percentage of herbage area in a grid zone with spatial resolution is 0.083 degree; *F+G (%)*, the percentage of deciduous forest and herbage area to all vegetation area in a grid zone with spatial resolution is 0.083 degree.
